# Supplementary material for: Purification and In Vitro Evaluation of an Anti-HER2 Affibody-Monomethyl Auristatin E Conjugate in HER2-Positive Cancer Cells
Source: MDPI journal article supplement (doi:10.3390/biology10080758), 2021-08-07
Supplement: s1 [file s1]

Article

# Purification and In Vitro Evaluation of an Anti-HER2 Affibody-Monomethyl Auristatin E Conjugate in HER2-Positive Cancer Cells

Isabella Damiani, Silvia Castiglioni, Alicja Sochaj-Gregorczyk, Fabrizia Bonacina, Irma Colombo, Valentina Rusconi, Jacek Otlewski, Alberto Corsini and Stefano Bellosta

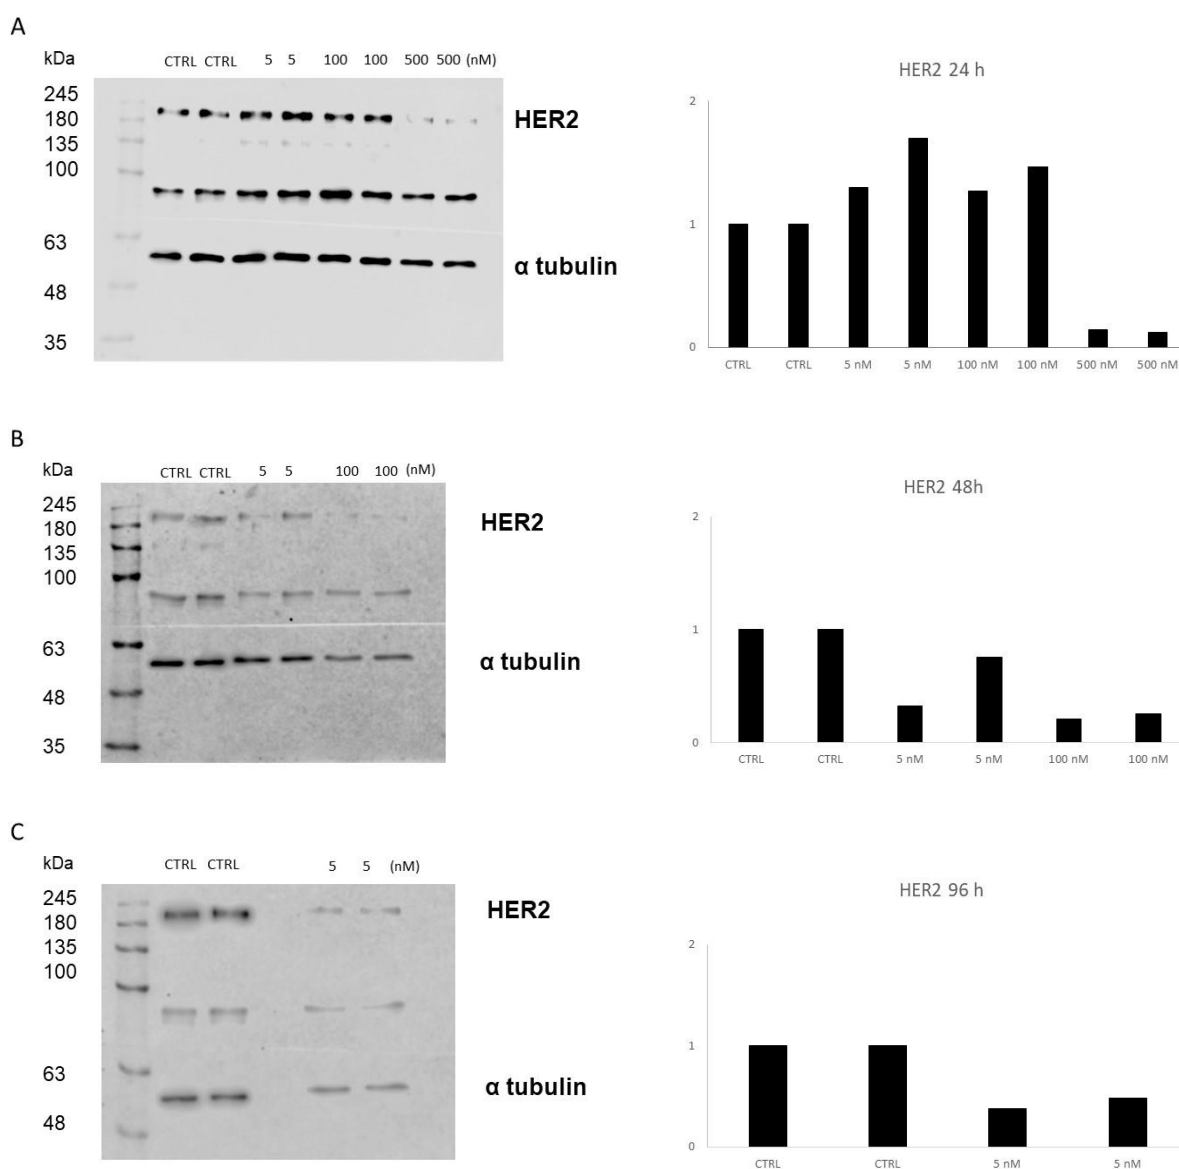

**Figure S1.** HER2 expression in SK-BR-3 cells. (A) (left) Representative western blot of  $Z_{HER2:2891}DCS-MMAE$  treatment (5, 100 and 500 nM) after 24 hours. (right) Densitometry analysis of the western blot in A). (B) (left) Representative western blot of  $Z_{HER2:2891}DCS-MMAE$  treatment (5 and 100 nM) after 48 hours. (right) Densitometry analysis of the western blot in

(B). (C) (left) Representative western blot of Z<sub>HER2:289i</sub>DCS-MMAE treatment (5 nM) after 96 hours. (right) Densitometry analysis of the western blot in (C).

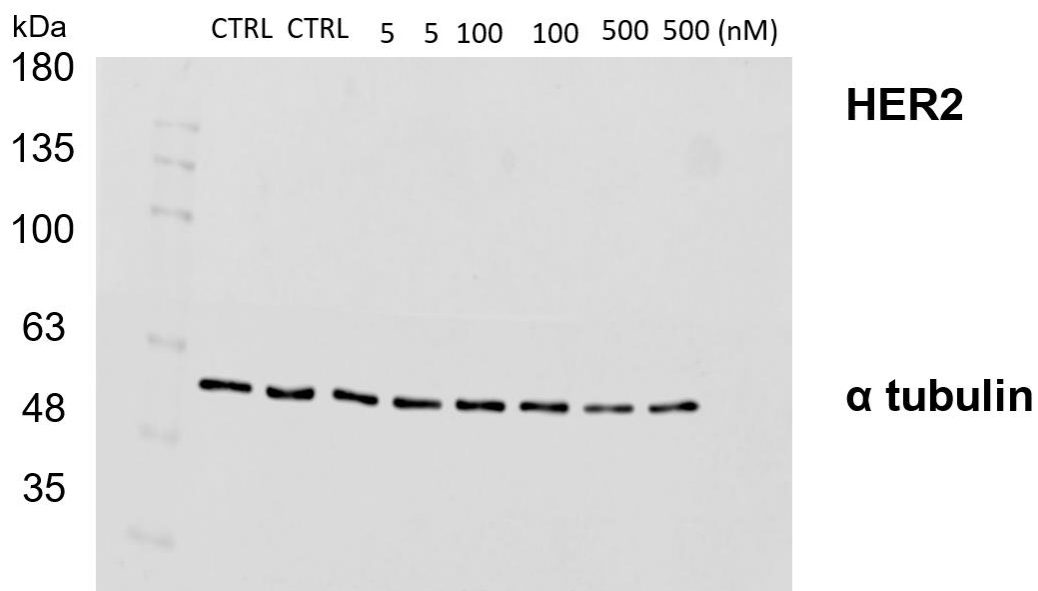

**Figure S2.** HER2 expression in MDA-MB-231 cells. Representative western blot of Z<sub>HER2:289i</sub>DCS-MMAE treatment (5, 100 and 500 nM) after 24 hours.
